# Supplementary material
Source: Springer Nature journal article supplement (https://www.springermedizin.de/resource/supplementary/12885_2012_3812_MOESM4_ESM.pdf/9464510)

**A**

## Kaplan-Meier Survival Estimates

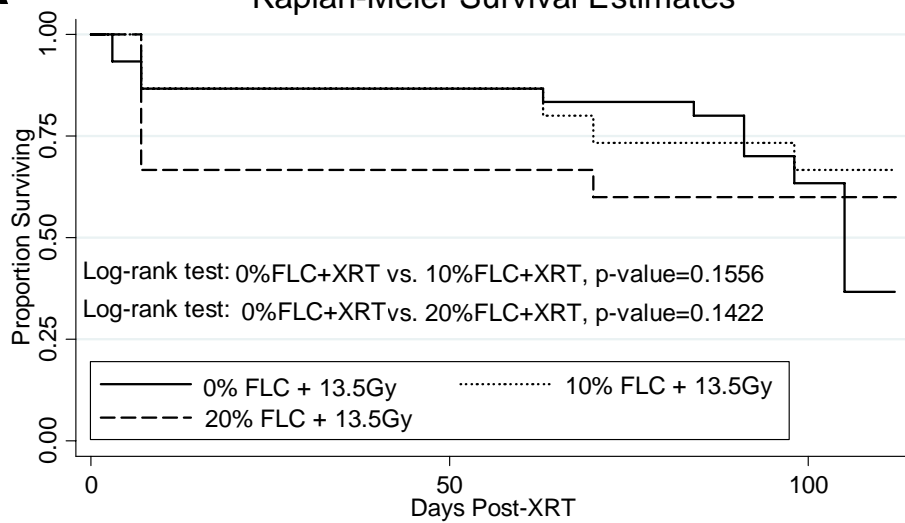**+24 Hours**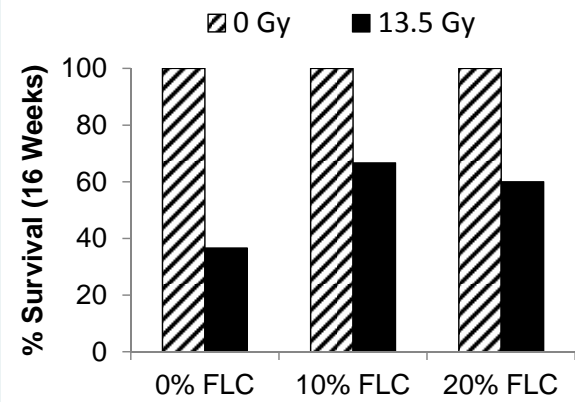**B**

## Kaplan-Meier Survival Estimates

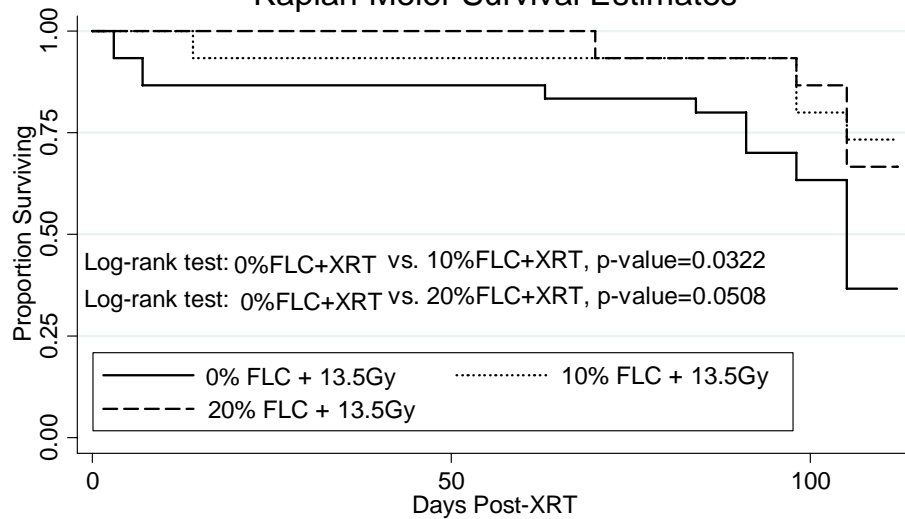**+48 Hours**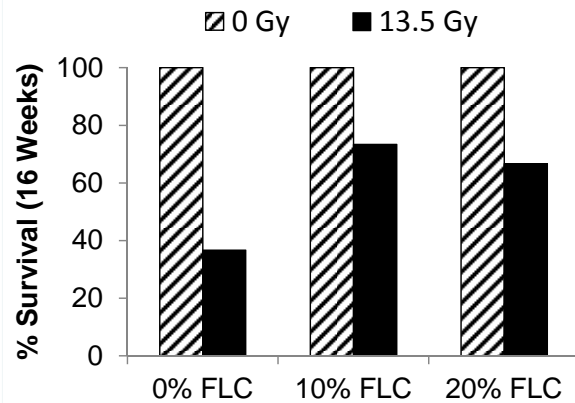**C**

## Kaplan-Meier Survival Estimates

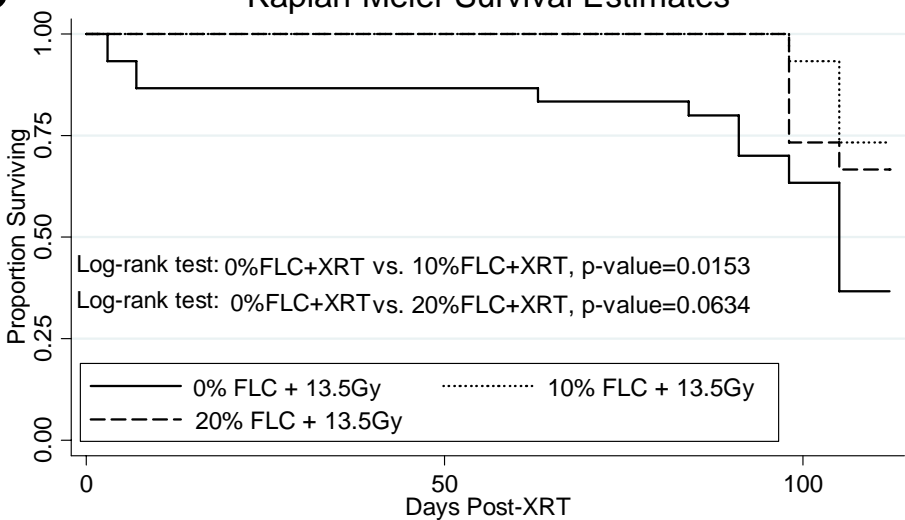**+72 Hours**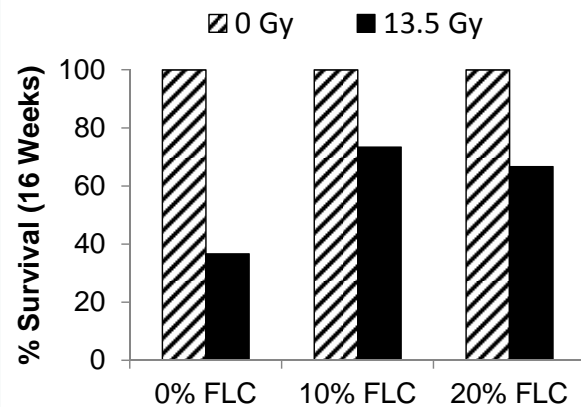

Supplement: MOESM4 [file 9464510]
